# Supplementary material for: Identification of promising nutraceuticals against filarial immune-modulatory proteins: insights from in silico and ex vivo studies
Source: Royal Society of Chemistry journal article supplement (doi:10.1039/d2ra03287b), 2022-01-01
Supplement: d2ra03287b1.pdf [file d2ra03287b1.pdf]

**Supplementary Table 1:** Lipinski rule of 5 for predicting drug likeness properties of used nutraceuticals

| Name of Agents | PubChem<br>CID | Mass<br>(g/mol) | H-<br>Bond<br>Donor | H-Bond<br>Acceptor | cLogP  | Molar<br>Refractivity |
|----------------|----------------|-----------------|---------------------|--------------------|--------|-----------------------|
| DEC            | 3052           | 199.29          | 0                   | 4                  | 0.6956 | 57.386                |
| Albandazole    | 2082           | 263.33          | 2                   | 4                  | 3.24   | 73.13                 |
| B-Carotene     | 5280489        | 536.9           | 0                   | 0                  | 12.605 | 181.39                |
| Lycopene       | 4469           | 536.9           | 0                   | 0                  | 12.93  | 185.57                |
| Ascorbic Acid  | 54670067       | 176             | 4                   | 6                  | 1.707  | 35.256                |
| Naringin       | 442428         | 580.5           | 8                   | 14                 | 1.16   | 134.14                |
| Zerumbone      | 5470187        | 218.33          | 0                   | 1                  | 4.21   | 69.29                 |
| Emodin         | 3220           | 270.24          | 3                   | 5                  | 1.88   | 69.48                 |
| Cirtic Acid    | 311            | 192.12          | 4                   | 7                  | -1.24  | 37.09                 |

**Supplementary Table 2. Properties of selected nutraceutical components used in the docking analysis.**

| Parameters                  | Name of Drug/ Agent     |                         |                         |                             |                             |                         |                         |                         |                             |
|-----------------------------|-------------------------|-------------------------|-------------------------|-----------------------------|-----------------------------|-------------------------|-------------------------|-------------------------|-----------------------------|
| Absorption                  | DEC                     | Albandazole             | $\beta$ -Carotene       | Lycopene                    | Ascorbic acid               | Naringin                | Zerumbone               | Emodin                  | Citric Acid                 |
| Blood-Brain Barrier         | BBB+                    | BBB+                    | BBB+                    | BBB+                        | BBB+                        | BBB-                    | BBB+                    | BBB+                    | BBB+                        |
| Human Intestinal Absorption | HIA+                    | HIA+                    | HIA+                    | HIA+                        | HIA+                        | HIA+                    | HIA+                    | HIA+                    | HIA+                        |
| Caco-2 Permeability         | Caco2+                  | Caco2+                  | Caco2+                  | Caco2+                      | Caco2-                      | Caco2-                  | Caco2+                  | Caco2+                  | Caco2-                      |
| P-glycoprotein Substrate    | Substrate Non Inhibitor | Substrate Non Inhibitor | Non-Substrate Inhibitor | Non Substrate Non Inhibitor | Non-Substrate Non Inhibitor | Substrate Non Inhibitor | Substrate Non Inhibitor | Substrate Non Inhibitor | Non-Substrate Non Inhibitor |
| hERG                        | Weak Inhibitor          | Weak Inhibitor          | Weak Inhibitor          | Weak Inhibitor              | Weak Inhibitor              | Weak Inhibitor          | Weak Inhibitor          | Weak Inhibitor          | Weak Inhibitor              |
| AMES Toxicity               | Non-AMES Toxic          | Non-AMES Toxic          | Non-AMES Toxic          | Non-AMES Toxic              | Non-AMES Toxic              | AMES Toxic              | Non-AMES Toxic          | AMES Toxic              | Non-AMES Toxic              |
| Carcinogens                 | Non-Carcinogens         | Non-Carcinogens         | Non-Carcinogens         | Non-Carcinogens             | Non-Carcinogens             | Non-Carcinogens         | Non-Carcinogens         | Non-Carcinogens         | Non-Carcinogens             |
| Acute Oral Toxicity         | III                     | III                     | III                     | III                         | IV                          | III                     | III                     | III                     | III                         |
| Rat Acute Toxicity          | 2.2639 LD50, mol/Kg     | 2.075 LD50, mol/Kg      | 1.598 LD50, mol/Kg      | 1.5357 LD50, mol/Kg         | 1.3059 LD50, mol/Kg         | 2.2619 LD50, mol/Kg     | 1.8726 LD50, mol/Kg     | 2.5826 LD50, mol/Kg     | 1.778 LD50, mol/Kg          |

**Supplementary Table 3: ENOLASE** Docked complex showing interacting receptor residue, interacting residue common in active site and ligand and protein complex involved in H-bonding.

| Receptor | Drug Name (PubChem CID) | Interacting receptor residue                                                                                                                                                                                                                                                                                                                                                         | Interacting residue in active site | Ligand and Protein atom involved in H-bonding                                                                                                                                                                                          |
|----------|-------------------------|--------------------------------------------------------------------------------------------------------------------------------------------------------------------------------------------------------------------------------------------------------------------------------------------------------------------------------------------------------------------------------------|------------------------------------|----------------------------------------------------------------------------------------------------------------------------------------------------------------------------------------------------------------------------------------|
| Enolase  | DEC                     | GLY <sup>105</sup> , ALA <sup>106</sup> , SER <sup>107</sup> , HIS <sup>225</sup> , GLN <sup>233</sup> , GLU <sup>234</sup> , GLU <sup>277</sup> , GLU <sup>317</sup> , ASP <sup>386</sup> , ASP <sup>387</sup> , LYS <sup>411</sup> , HIS <sup>439</sup> , ARG <sup>440</sup> , SER <sup>441</sup> , LYS <sup>462</sup>                                                             | NA                                 | LYS <sup>411</sup> :HZ2 - LIGAND:O1                                                                                                                                                                                                    |
|          | Albendazole             | THR <sup>376</sup> , VAL <sup>400</sup> , LYS <sup>403</sup> , CYS <sup>405</sup> , ASN <sup>406</sup> , ASN <sup>431</sup> , GLY <sup>432</sup> , TRP <sup>433</sup> , ARG <sup>497</sup> , LYS <sup>498</sup>                                                                                                                                                                      | ACTIVE SITE 1                      | LIGAND:H20 – GLY <sup>432</sup> :O                                                                                                                                                                                                     |
|          | β- Carotene             | THR <sup>246</sup> , MET <sup>249</sup> , LYS <sup>250</sup> , SER <sup>253</sup> , GLU <sup>254</sup> , HIS <sup>257</sup> , HIS <sup>258</sup> , ASN <sup>261</sup> , LEU <sup>479</sup> , GLU <sup>482</sup> , GLU <sup>483</sup> , GLY <sup>486</sup>                                                                                                                            | ACTIVE SITE 1                      | NA                                                                                                                                                                                                                                     |
|          | Lycopene                | LYS <sup>229</sup> , LYS <sup>266</sup> , GLN <sup>285</sup> , SER <sup>286</sup> , LYS <sup>288</sup> , GLU <sup>289</sup> , ASN <sup>292</sup> , SER <sup>295</sup> , ASP <sup>296</sup> , ILE <sup>298</sup> , ALA <sup>299</sup> , THR <sup>304</sup> , ASP <sup>327</sup> , ASN <sup>330</sup> , LYS <sup>332</sup> , SER <sup>333</sup> , ASP <sup>334</sup>                   | NA                                 | NA                                                                                                                                                                                                                                     |
|          | Ascorbic acid           | GLY <sup>105</sup> , ALA <sup>106</sup> , ASN <sup>218</sup> , HIS <sup>225</sup> , GLN <sup>233</sup> , GLU <sup>234</sup> , GLU <sup>277</sup> , ASP <sup>312</sup> , LYS <sup>411</sup> , HIS <sup>439</sup> , ARG <sup>440</sup> , SER <sup>441</sup> , LYS <sup>462</sup> , ARG <sup>471</sup>                                                                                  | ACTIVE SITE 2                      | GLN <sup>233</sup> :HE22 – LIGAND:O3<br>LYS <sup>411</sup> :HZ1 – LIGAND:O2<br>HIS <sup>439</sup> :HE2 – LIGAND:O5<br>ARG <sup>440</sup> :HE – LIGAND:O4<br>SER <sup>441</sup> :H – LIGAND :O4<br>LIGAND:H18 – GLU <sup>234</sup> :OE2 |
|          | Zerumbone               | LYS <sup>229</sup> , LEU <sup>230</sup> , ALA <sup>231</sup> , GLN <sup>285</sup> , SER <sup>286</sup> , ASN <sup>287</sup> , LYS <sup>288</sup> , LEU <sup>326</sup> , ASP <sup>327</sup> , ASP <sup>334</sup> , GLN <sup>337</sup> , LEU <sup>339</sup> , LEU <sup>347</sup> , PHE <sup>351</sup>                                                                                  | ACTIVE SITE 2                      | NA                                                                                                                                                                                                                                     |
|          | Naringin                | ASP <sup>80</sup> , ARG <sup>82</sup> , ASN <sup>84</sup> , SER <sup>104</sup> , GLY <sup>105</sup> , ALA <sup>106</sup> , SER <sup>107</sup> , THR <sup>108</sup> , GLY <sup>109</sup> , VAL <sup>110</sup> , GLU <sup>112</sup> , ALA <sup>113</sup> , LEU <sup>114</sup> , GLU <sup>115</sup> , ARG <sup>117</sup> , ASN <sup>119</sup> , LYS <sup>127</sup> , GLY <sup>442</sup> | ACTIVE SITE 2                      | ARG <sup>82</sup> :HH22 – LIGAND:O6<br>THR <sup>108</sup> :H – LIGAND:O8<br>LIGAND:60 – SER <sup>107</sup> :OG<br>LIGAND:H73 – GLU <sup>112</sup> :O                                                                                   |
|          | Emodin                  | GLY <sup>105</sup> , SER <sup>107</sup> , THR <sup>108</sup> , GLY <sup>109</sup> , VAL <sup>110</sup> , GLU <sup>112</sup> , ALA <sup>113</sup> , LEU <sup>114</sup> , GLU <sup>115</sup> , ARG <sup>117</sup> , ASN <sup>119</sup> , LYS <sup>127</sup> , ARG <sup>440</sup>                                                                                                       | ACTIVE SITE 2                      | NA                                                                                                                                                                                                                                     |
|          | Citric acid             | GLY <sup>105</sup> , ALA <sup>106</sup> , SER <sup>107</sup> , HIS <sup>225</sup> , GLN <sup>233</sup> , GLN <sup>234</sup> , GLU <sup>277</sup> , ASP <sup>312</sup> , ASP <sup>361</sup> , ASP <sup>386</sup> , LYS <sup>411</sup> , SER <sup>438</sup> , HIS <sup>439</sup> , ARG <sup>440</sup> , SER <sup>441</sup>                                                             | ACTIVE SITE 2                      | ALA <sup>106</sup> :N – LIGAND:O5<br>LYS <sup>411</sup> :NZ – LIGAND:O2<br>LIGAND:H19 – HIS <sup>439</sup> :O<br>LIGAND:H20 – ASP <sup>312</sup> :OD2                                                                                  |

**Supplementary Table 4:** ES-62 precursor showing interacting receptor residue, interacting residue common in active site and ligand and protein complex involved in H-bonding.

| Receptor       | Drug Name (PubChem CID) | Interacting receptor residue                                                                                                                                                                                                                                                                                                                                                                                 | Interacting residue in active site | Ligand and Protein atom involved in H-bonding                                                                                                                                                                                                                                     |
|----------------|-------------------------|--------------------------------------------------------------------------------------------------------------------------------------------------------------------------------------------------------------------------------------------------------------------------------------------------------------------------------------------------------------------------------------------------------------|------------------------------------|-----------------------------------------------------------------------------------------------------------------------------------------------------------------------------------------------------------------------------------------------------------------------------------|
| ES62 Precursor | DEC                     | LEU <sup>175</sup> , ARG <sup>178</sup> , ARG <sup>179</sup> , THR <sup>209</sup> , GLY <sup>210</sup> , ALA <sup>211</sup> , GLU <sup>328</sup> , GLU <sup>329</sup> , GLY <sup>331</sup> , TYR <sup>332</sup> , GLN <sup>477</sup> , ASN <sup>479</sup> , LYS <sup>481</sup>                                                                                                                               | ACTIVE SITE 1 and ACTIVE SITE 3    | GLY <sup>331</sup> :H – LIGAND:O1                                                                                                                                                                                                                                                 |
|                | Albendazole             | LEU <sup>175</sup> , ARG <sup>178</sup> , ARG <sup>179</sup> , THR <sup>209</sup> , GLU <sup>328</sup> , GLU <sup>329</sup> , GLY <sup>331</sup> , TYR <sup>332</sup> , HIS <sup>433</sup> , HIS <sup>434</sup> , GLN <sup>477</sup> , ASN <sup>479</sup> , LYS <sup>481</sup>                                                                                                                               | ACTIVE SITE 1                      | ARG <sup>178</sup> :HH12 – LIGAND:O4<br>HIS <sup>433</sup> :HE2 – LIGAND:O2                                                                                                                                                                                                       |
|                | β carotene              | PRO <sup>104</sup> , ASN <sup>105</sup> , PRO <sup>107</sup> , HIS <sup>108</sup> , TRP <sup>109</sup> , GLY <sup>132</sup> , GLY <sup>133</sup> , GLU <sup>212</sup> , THR <sup>215</sup> , TYR <sup>249</sup> , GLN <sup>330</sup> , HIS <sup>337</sup> , ILE <sup>340</sup> , THR <sup>341</sup> , LYS <sup>343</sup>                                                                                     | ACTIVE SITE 1                      | NA                                                                                                                                                                                                                                                                                |
|                | Lycopene                | TYR <sup>147</sup> , ASP <sup>148</sup> , ALA <sup>165</sup> , GLN <sup>166</sup> , THR <sup>167</sup> , ALA <sup>169</sup> , GLY <sup>170</sup> , LEU <sup>173</sup> , TYR <sup>177</sup> , GLU <sup>230</sup> , TYR <sup>233</sup> , ARG <sup>234</sup> , GLY <sup>236</sup> , LEU <sup>367</sup>                                                                                                          | ACTIVE SITE 2                      | NA                                                                                                                                                                                                                                                                                |
|                | Ascorbic acid           | LEU <sup>175</sup> , ARG <sup>178</sup> , ARG <sup>179</sup> , GLY <sup>208</sup> , THR <sup>209</sup> , TRP <sup>281</sup> , GLU <sup>328</sup> , GLU <sup>329</sup> , TYR <sup>332</sup> , HIS <sup>433</sup> , HIS <sup>434</sup> , ASN <sup>479</sup> , LYS <sup>481</sup>                                                                                                                               | ACTIVE SITE 1                      | ARG <sup>178</sup> :HH12 – LIGAND:O5<br>ARG <sup>178</sup> :HH22 – LIGAND:O3<br>TYR <sup>332</sup> :HH – LIGAND:O4<br>HIS <sup>433</sup> :HE2 – LIGAND:O5<br>LIGAND:H17 – GLU <sup>328</sup> :OE1<br>LIGAND:H18 – GLU <sup>329</sup> :OE2<br>LIGAND:H19 – ASN <sup>479</sup> :OD1 |
|                | Zerumbone               | PRO <sup>107</sup> , HIS <sup>108</sup> , TRP <sup>109</sup> , GLY <sup>132</sup> , GLY <sup>133</sup> , THR <sup>215</sup> , TYR <sup>249</sup> , GLN <sup>330</sup>                                                                                                                                                                                                                                        | ACTIVE SITE 3                      | NA                                                                                                                                                                                                                                                                                |
|                | Naringin                | LEU <sup>175</sup> , ARG <sup>179</sup> , LYS <sup>182</sup> , THR <sup>209</sup> , GLY <sup>210</sup> , ALA <sup>211</sup> , GLU <sup>212</sup> , GLU <sup>328</sup> , GLU <sup>329</sup> , GLN <sup>330</sup> , GLY <sup>331</sup> , TYR <sup>332</sup> , THR <sup>408</sup> , LYS <sup>412</sup> , PRO <sup>475</sup> , GLN <sup>476</sup> , GLN <sup>477</sup> , ASN <sup>479</sup> , LYS <sup>481</sup> | ACTIVE SITE 2                      | GLY <sup>331</sup> :H – LIGAND:O5<br>LIGAND:H60 – GLU <sup>328</sup> :OE1<br>LIGAND:H62 – GLY <sup>210</sup> :O                                                                                                                                                                   |
|                | Emodin                  | LEU <sup>175</sup> , ARG <sup>179</sup> , LYS <sup>182</sup> , THR <sup>209</sup> , GLY <sup>210</sup> , ALA <sup>211</sup> , GLU <sup>212</sup> , GLU <sup>328</sup> , GLU <sup>329</sup> , GLN <sup>330</sup> , GLY <sup>331</sup> , TYR <sup>332</sup> , THR <sup>408</sup> , LYS <sup>412</sup> , PRO <sup>475</sup> , GLN <sup>476</sup> , GLN <sup>477</sup> , ASN <sup>479</sup> , LYS <sup>481</sup> | ACTIVE SITE 1                      | ARG <sup>178</sup> :HH11 – LIGAND:O3<br>GLY <sup>331</sup> :H – LIGAND:O4                                                                                                                                                                                                         |
|                | Citric acid             | TYR <sup>171</sup> , TYR <sup>172</sup> , THR <sup>174</sup> , LEU <sup>175</sup> , ARG <sup>178</sup> , TYR <sup>429</sup>                                                                                                                                                                                                                                                                                  | ACTIVE SITE 1                      | THR <sup>174</sup> :OG1 – LIGAND:O4<br>THR <sup>174</sup> :OG1 – LIGAND:O6                                                                                                                                                                                                        |

|  |  |                                                              |  |                                                                                                                   |
|--|--|--------------------------------------------------------------|--|-------------------------------------------------------------------------------------------------------------------|
|  |  | HIS <sup>433</sup> , ASN <sup>479</sup> , LYS <sup>481</sup> |  | ARG <sup>178</sup> :NH1 – LIGAND:O7<br>TYR <sup>429</sup> :OH – LIGAND:O2<br>LIGAND:H2O – THR <sup>174</sup> :OG1 |
|--|--|--------------------------------------------------------------|--|-------------------------------------------------------------------------------------------------------------------|

**Supplementary Table 5:** Serpin showing interacting receptor residue, interacting residue common in active site and ligand and protein complex involved in H-bonding

| Receptor | Drug Name (PubChem CID) | Interacting receptor residue                                                                                                                                                                                                                                                                                                         | Interacting residue in active site | Ligand and Protein atom involved in H-bonding                                                                                                                                                                                           |
|----------|-------------------------|--------------------------------------------------------------------------------------------------------------------------------------------------------------------------------------------------------------------------------------------------------------------------------------------------------------------------------------|------------------------------------|-----------------------------------------------------------------------------------------------------------------------------------------------------------------------------------------------------------------------------------------|
| Serpin   | DEC                     | ILE <sup>43</sup> , GLN <sup>45</sup> , LYS <sup>48</sup> , SER <sup>49</sup> , VAL <sup>50</sup> , VAL <sup>51</sup> , GLY <sup>295</sup> , LYS <sup>296</sup> , MET <sup>297</sup> , ASP <sup>298</sup> , GLU <sup>301</sup> , THR <sup>302</sup> , LYS <sup>305</sup>                                                             | ACTIVE SITE 2                      | NA                                                                                                                                                                                                                                      |
|          | Albendazole             | THR <sup>196</sup> , GLN <sup>197</sup> , ASP <sup>199</sup> , ASN <sup>202</sup> , LEU <sup>223</sup> , GLN <sup>224</sup> , SER <sup>225</sup> , GLU <sup>226</sup> , PHE <sup>227</sup> , LEU <sup>240</sup> , PRO <sup>241</sup> , TYR <sup>242</sup> , ILE <sup>243</sup> , GLY <sup>244</sup> , GLU <sup>245</sup>             | ACTIVE SITE 1                      | GLN <sup>224</sup> :H – LIGAND:O2                                                                                                                                                                                                       |
|          | β carotene              | PRO <sup>27</sup> , TYR <sup>30</sup> , ALA <sup>31</sup> , ASN <sup>34</sup> , ILE <sup>35</sup> , ILE <sup>78</sup> , PHE <sup>79</sup> , GLY <sup>81</sup> , GLY <sup>82</sup> , ARG <sup>270</sup> , LEU <sup>273</sup> , SER <sup>274</sup> , SER <sup>277</sup> , ILE <sup>306</sup> , GLY <sup>307</sup> , LYS <sup>379</sup> | ACTIVE SITE 1                      | NA                                                                                                                                                                                                                                      |
|          | Lycopene                | GLY <sup>121</sup> , PHE <sup>122</sup> , SER <sup>123</sup> , SER <sup>144</sup> , GLU <sup>146</sup> , GLN <sup>147</sup> , SER <sup>148</sup> , GLN <sup>149</sup> , GLN <sup>150</sup> , GLN <sup>153</sup> , THR <sup>322</sup> , ASN <sup>323</sup>                                                                            | NA                                 | NA                                                                                                                                                                                                                                      |
|          | Ascorbic acid           | LEU <sup>97</sup> , ASP <sup>101</sup> , ASN <sup>111</sup> , ILE <sup>112</sup> , ALA <sup>113</sup> , ASN <sup>114</sup> , ARG <sup>115</sup> , GLY <sup>137</sup> , GLU <sup>138</sup> , THR <sup>139</sup> , LYS <sup>162</sup>                                                                                                  | ACTIVE SITE 1                      | ALA <sup>113</sup> :H - LIGAND:O5<br>ARG <sup>115</sup> :HE – LIGAND:O6<br>LIGAND:H17 – ASP <sup>101</sup> :OD1<br>LIGAND:H17 – ASP <sup>101</sup> :OD2<br>LIGAND:H19 – ASN <sup>111</sup> :OD1<br>LIGAND:H20 – THR <sup>139</sup> :OG1 |
|          | Zerumbone               | TYR <sup>117</sup> , HIS <sup>141</sup> , SER <sup>142</sup> , PHE <sup>143</sup> , GLU <sup>154</sup> , ASN <sup>157</sup> , TRP <sup>158</sup> , GLN <sup>161</sup>                                                                                                                                                                | NA                                 | NA                                                                                                                                                                                                                                      |
|          | Naringin                | PHE <sup>12</sup> , SER <sup>15</sup> , ILE <sup>16</sup> , VAL <sup>19</sup> , ILE <sup>25</sup> , HIS <sup>92</sup> , LYS <sup>95</sup> , LEU <sup>96</sup> , VAL <sup>99</sup> , ARG <sup>103</sup> , GLY <sup>244</sup> , GLU <sup>245</sup> , GLU <sup>246</sup> , GLN <sup>376</sup> , ASN <sup>377</sup> , LEU <sup>378</sup> | ACTIVE SITE 1                      | ARG <sup>103</sup> :HH12 – LIGAND:O1<br>ARG <sup>103</sup> :HH12 – LIGAND:O4<br>ARG <sup>103</sup> :HH22 – LIGAND:O4<br>ASN <sup>377</sup> :HD22 – LIGAND:O7<br>LIGAND:H73 – HIS <sup>92</sup> :O                                       |
|          | Emodin                  | ILE <sup>25</sup> , LYS <sup>95</sup> , LEU <sup>96</sup> , VAL <sup>99</sup> , ILE <sup>100</sup> , ARG <sup>103</sup> , GLU <sup>246</sup> , VAL <sup>247</sup> , GLN <sup>376</sup> , ASN <sup>377</sup> , LEU <sup>378</sup>                                                                                                     | ACTIVE SITE 1                      | ARG <sup>103</sup> :HH22 – LIGAND:O2                                                                                                                                                                                                    |
|          | Citric acid             | LEU <sup>96</sup> , VAL <sup>99</sup> , ILE <sup>100</sup> , ARG <sup>103</sup> , LEU <sup>110</sup> , GLU <sup>245</sup>                                                                                                                                                                                                            | ACTIVE SITE 3                      | LIGAND:H19 – GLU <sup>246</sup> :O                                                                                                                                                                                                      |

|  |                                                                                                                                |  |
|--|--------------------------------------------------------------------------------------------------------------------------------|--|
|  | GLU <sup>246</sup> , VAL <sup>247</sup> , GLN <sup>276</sup> ,<br>ASN <sup>277</sup> , LUE <sup>278</sup> , THR <sup>380</sup> |  |
|--|--------------------------------------------------------------------------------------------------------------------------------|--|

**Supplementary Table 6:** Cystatin showing interacting receptor residue, interacting residue common in active site and ligand and protein complex involved in H-bonding

| Receptor | Drug Name     | Interacting receptor residue                                                                                                                                                                                                                                                                                                                                                                                    | Interacting residue in active site | Ligand and Protein atom involved in H-bonding                                                                   |
|----------|---------------|-----------------------------------------------------------------------------------------------------------------------------------------------------------------------------------------------------------------------------------------------------------------------------------------------------------------------------------------------------------------------------------------------------------------|------------------------------------|-----------------------------------------------------------------------------------------------------------------|
| Cystatin | DEC           | ILE <sup>5</sup> , LEU <sup>8</sup> , SER <sup>9</sup> ,<br>LEU <sup>12</sup> , SER <sup>15</sup> , VAL <sup>70</sup> ,<br>ALA <sup>71</sup> , GLY <sup>72</sup> , ILE <sup>73</sup> ,<br>TRP <sup>114</sup> , SER <sup>115</sup> , ALA <sup>116</sup> ,<br>GLN <sup>119</sup> , THR <sup>121</sup> , PHE <sup>122</sup> ,<br>LYS <sup>123</sup>                                                                | ACTIVE SITE 1                      | NA                                                                                                              |
|          | Albendazole   | VAL <sup>10</sup> , LEU <sup>11</sup> , LEU <sup>12</sup> ,<br>ILE <sup>13</sup> , LYS <sup>16</sup> , SER <sup>17</sup> ,<br>PHE <sup>18</sup> , ALA <sup>19</sup> , ARG <sup>20</sup> ,<br>GLU <sup>21</sup> , ARG <sup>23</sup> , LEU <sup>24</sup> ,<br>ARG <sup>26</sup> , GLN <sup>68</sup>                                                                                                               | NA                                 | NA                                                                                                              |
|          | β carotene    | LYS <sup>16</sup> , ARG <sup>20</sup> , GLU <sup>21</sup> ,<br>ILE <sup>22</sup> , TYR <sup>29</sup> , ASP <sup>33</sup> ,<br>GLU <sup>35</sup> , ILE <sup>36</sup> , THR <sup>67</sup> ,<br>VAL <sup>69</sup> , VAL <sup>70</sup> , ALA <sup>71</sup> ,<br>GLY <sup>72</sup> , ILE <sup>73</sup> , TYR <sup>75</sup> ,<br>TRP <sup>118</sup>                                                                   | ACTIVE SITE 3                      | NA                                                                                                              |
|          | Lycopene      | MET <sup>1</sup> , PRO <sup>4</sup> , LEU <sup>8</sup> ,<br>GLN <sup>50</sup> , THR <sup>51</sup> , ARG <sup>52</sup> ,<br>TYR <sup>53</sup> , ARG <sup>54</sup> , TYR <sup>57</sup> ,<br>PRO <sup>105</sup> , LYS <sup>107</sup> , PHE <sup>109</sup> ,<br>LYS <sup>123</sup> , LEU <sup>126</sup> , THR <sup>127</sup>                                                                                        | ACTIVE SITE 1                      | NA                                                                                                              |
|          | Ascorbic acid | LEU <sup>11</sup> , LEU <sup>12</sup> , ILE <sup>13</sup> ,<br>LYS <sup>16</sup> , SER <sup>17</sup> , PHE <sup>18</sup> ,<br>ALA <sup>19</sup> , ARG <sup>20</sup> , GLU <sup>21</sup> ,<br>ILE <sup>22</sup> , ARG <sup>23</sup> , LEU <sup>24</sup> ,<br>VAL <sup>69</sup> , VAL <sup>70</sup>                                                                                                               | NA                                 | LEU <sup>24</sup> :H - LIGAND:O6<br>LIGAND:H17 - SER <sup>17</sup> :O<br>LIGAND:H20 - ILE <sup>92</sup> :O      |
|          | Zerumbone     | ILE <sup>5</sup> , LEU <sup>8</sup> , SER <sup>9</sup> ,<br>LEU <sup>12</sup> , SER <sup>15</sup> , LYS <sup>16</sup> ,<br>VAL <sup>70</sup> ALA <sup>71</sup> , TRP <sup>114</sup> ,<br>ALA <sup>116</sup> , GLN <sup>119</sup> , THR <sup>121</sup> ,<br>LYS <sup>123</sup>                                                                                                                                   | ACTIVE SITE 1                      | NA                                                                                                              |
|          | Naringin      | ILE <sup>5</sup> , LEU <sup>8</sup> , SER <sup>9</sup> ,<br>LEU <sup>12</sup> , SER <sup>15</sup> , LYS <sup>16</sup> ,<br>ARG <sup>20</sup> , GLU <sup>21</sup> , VAL <sup>70</sup> ,<br>ALA <sup>71</sup> , GLY <sup>72</sup> , ILE <sup>73</sup> ,<br>TRP <sup>114</sup> , SER <sup>115</sup> , ALA <sup>116</sup> ,<br>GLN <sup>119</sup> , THR <sup>121</sup> , PHE <sup>122</sup> ,<br>LYS <sup>123</sup> | ACTIVE SITE 1                      | SER <sup>15</sup> :HG - LIGAND:O12<br>ARG <sup>20</sup> :HH21 - LIGAND:O5<br>LIGAND:H73 - TRP <sup>114</sup> :O |
|          | Emodin        | LEU <sup>8</sup> , SER <sup>9</sup> , LEU <sup>12</sup> ,<br>SER <sup>15</sup> , LYS <sup>16</sup> , VAL <sup>70</sup> ,<br>ALA <sup>71</sup> , GLY <sup>72</sup> , ILE <sup>73</sup> ,<br>LYS <sup>74</sup> , TRP <sup>114</sup> , SER <sup>115</sup> ,                                                                                                                                                        | ACTIVE SITE 1                      | SER <sup>115</sup> :H - LIGAND:O5<br>LIGAND:H30 - ILE <sup>73</sup> :O                                          |

|  |             |                                                                                                                                                                                                                                                        |               |                                                                          |
|--|-------------|--------------------------------------------------------------------------------------------------------------------------------------------------------------------------------------------------------------------------------------------------------|---------------|--------------------------------------------------------------------------|
|  |             | ALA <sup>116</sup> , GLN <sup>119</sup> , THR <sup>121</sup>                                                                                                                                                                                           |               |                                                                          |
|  | Citric acid | LEU <sup>11</sup> , LEU <sup>12</sup> , ILE <sup>13</sup> ,<br>LYS <sup>16</sup> , SER <sup>17</sup> , PHE <sup>18</sup> ,<br>ALA <sup>19</sup> , GLU <sup>21</sup> , ILE <sup>22</sup> ,<br>ARG <sup>23</sup> , LEU <sup>24</sup> , VAL <sup>70</sup> | ACTIVE SITE 1 | LIGAND:H20 – SER <sup>17</sup> :O<br>LIGAND:H21 – GLU <sup>21</sup> :OE1 |

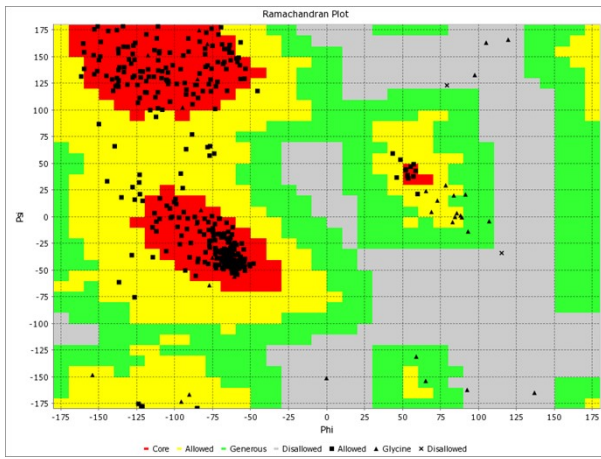

**A.**

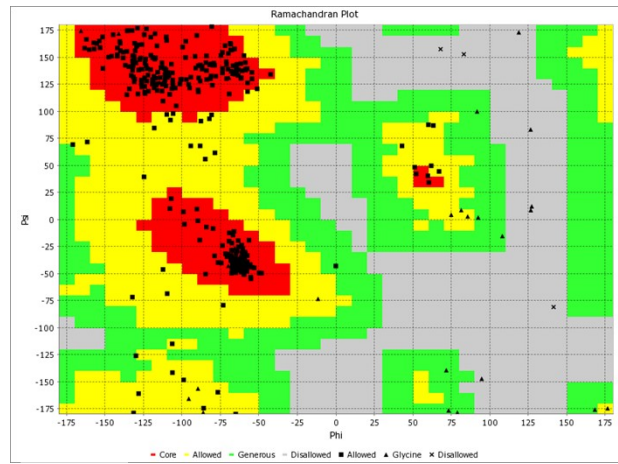

**B.**

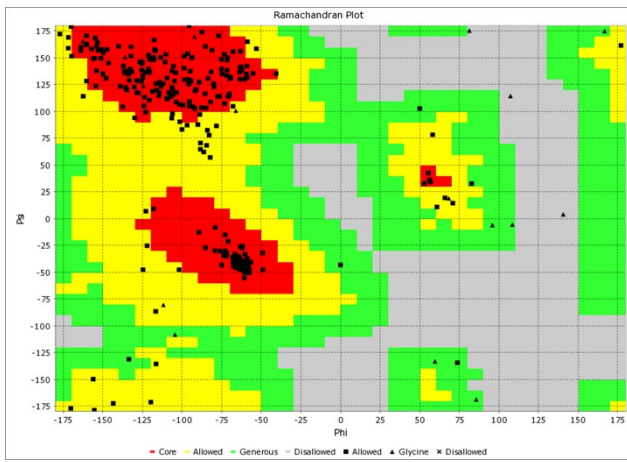

**C.**

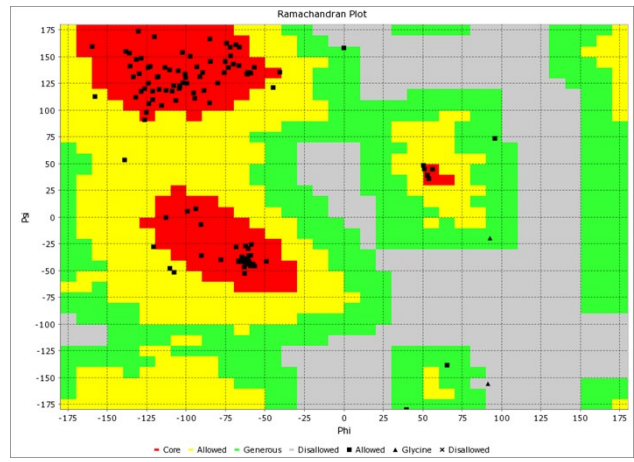

**D.**

**Supplementary Figure 1. Ramachandran plot showing the distribution of the protein's main chain  $\phi$ - $\Psi$  torsion angles (black squares) relative to the "core" (red) and "allowed" (yellow) regions, with residues falling in the "generously allowed" (green) and "disallowed" region black crossed, A. Enolase, B. ES-62 Precursor, C. Serpin, D. Cystatin.**



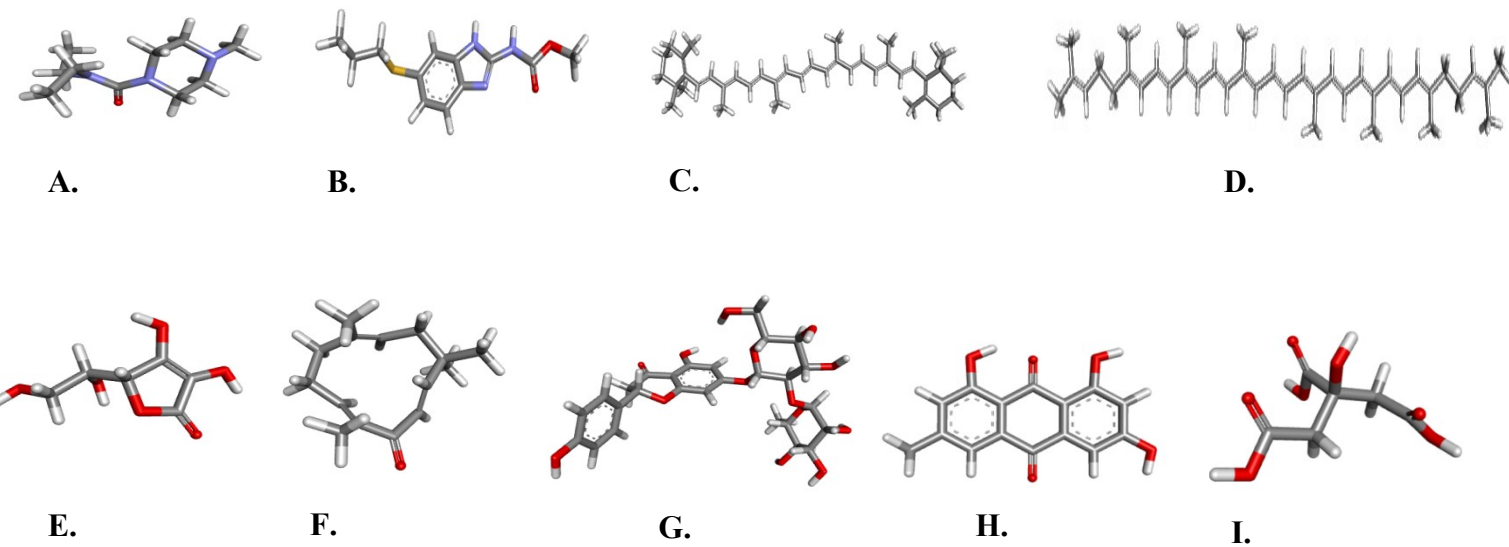

**Supplementary Figure 2. Three dimensional structures of anti-filarial drugs and nutraceutical compounds A. DEC, B. Albendazole C.  $\beta$ -Carotene, D. Lycopene, E. Ascorbic acid, F. Naringin, G. Zerumbone, H. Emodin and I. Citric acid**

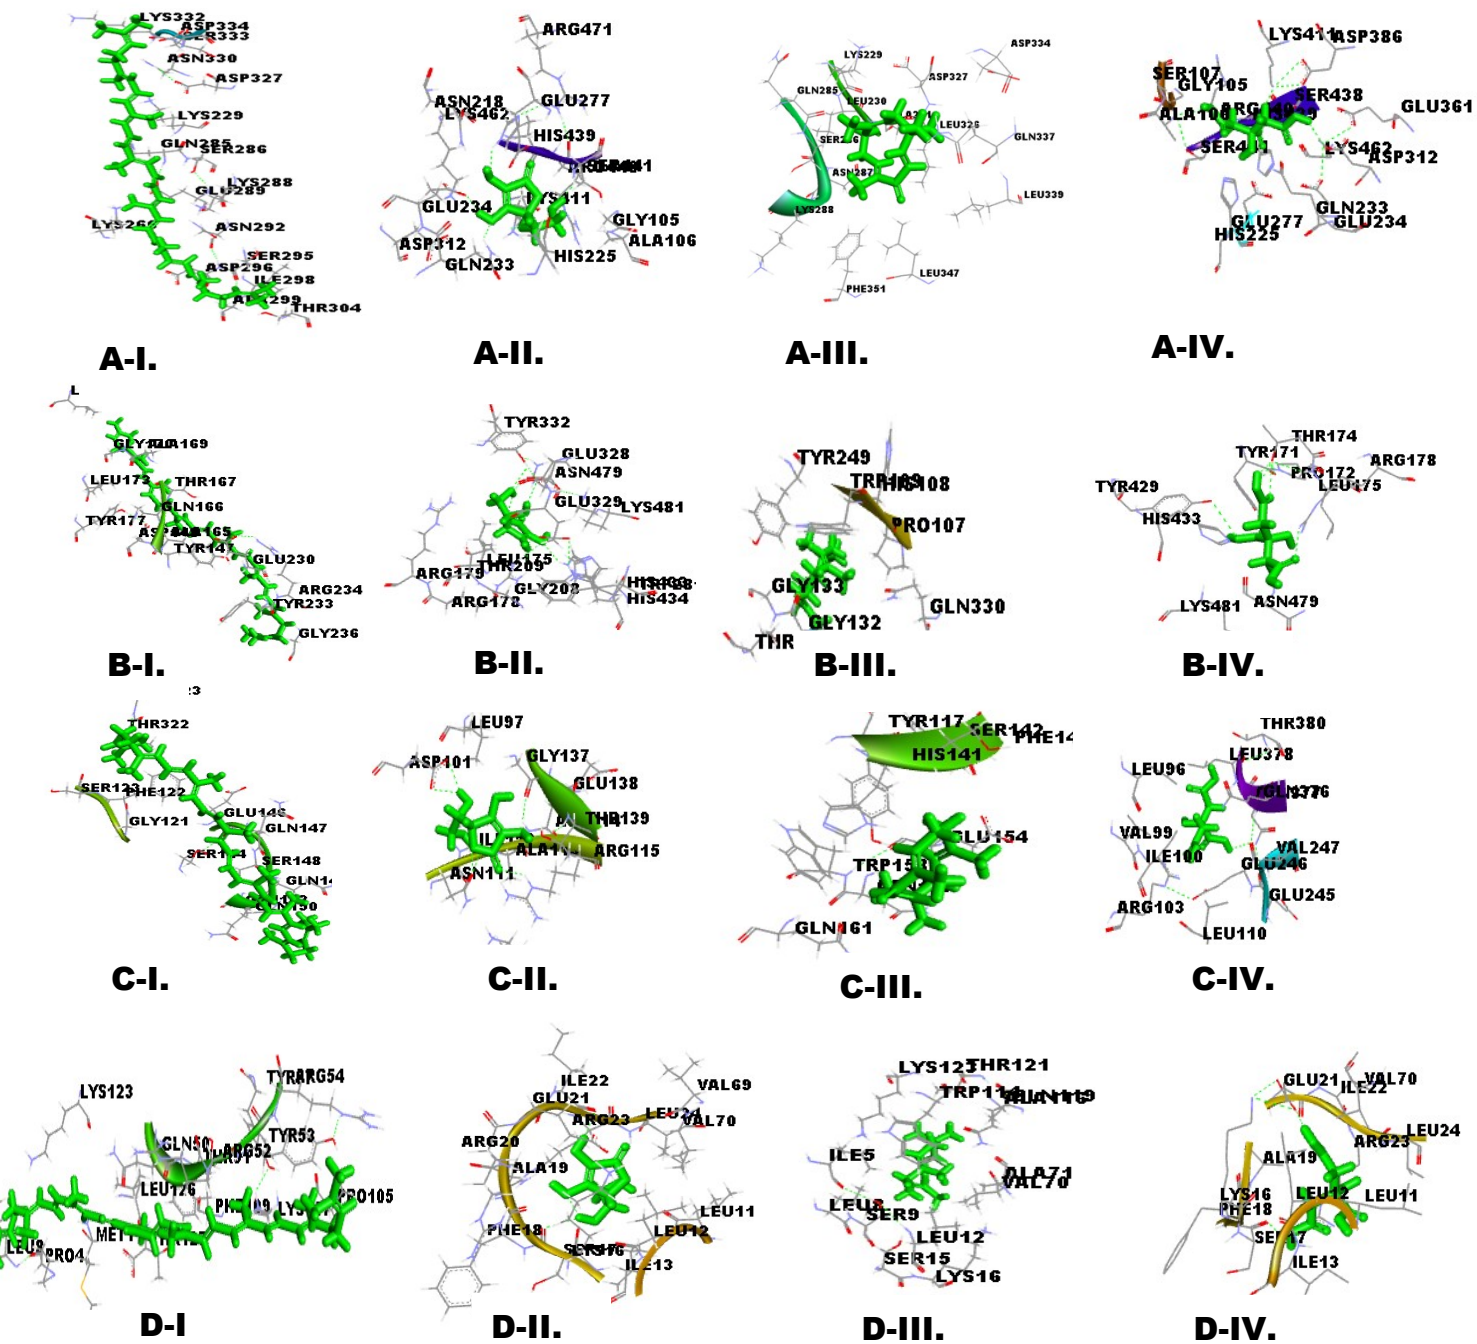

Supplementary Figure 3. Three dimensional (3D) interactions of filarial immune-modulatory proteins with anti-filarial drugs and nutraceutical compounds docked complexes were visualized by discovery studio 3.5. The ligands were represented by stick model in green color whereas interacting residue were labeled in black color: (A) Enolase, and (B) ES-62 Precursor, (C) Serpin and (D) Cystatin and I-Lycopene, II- Ascorbic Acid, III- Zerumbone and IV- Citric Acid.
